# Supplementary material for: Susceptibility to hormone-mediated cancer is reflected by different tick rates of the epithelial and general epigenetic clock
Source: PubMed Central journal article supplement (PMC8862470; doi:10.1186/s13059-022-02603-3), 2022-02-22
Supplement: 13059_2022_2603_MOESM1_ESM.pdf [file 13059_2022_2603_MOESM1_ESM.pdf]

# Susceptibility to hormone-mediated cancer is reflected by different tick rates of the epithelial and general epigenetic clock

Additional file 1

## Contents

|    |                                                                                                                                                                                  |    |
|----|----------------------------------------------------------------------------------------------------------------------------------------------------------------------------------|----|
| 1  | Fig. S1. Datasets and experimental design.                                                                                                                                       | 2  |
| 2  | Fig. S2. Detailed comparison of the WID general clock and other epigenetic clocks, and assessments of cell composition in response to menopause, hormone replacement and cancer. | 3  |
| 3  | Fig. S3. Detailed epidemiological assessment of the WID general clock age acceleration.                                                                                          | 3  |
| 4  | Fig. S4. Association of the WID general, epithelial and immune clocks with menopause, replicative age, and solo-WCGW methylation.                                                | 4  |
| 5  | Fig. S5. Association of WID-relative-epithelial- and -immune-age with chronological age and immune cell proportion and breast cancer subtype.                                    | 5  |
| 6  | Fig. S6. Epidemiological associations of the WID-relative-epithelial-age.                                                                                                        | 6  |
| 7  | Fig. S7. Epidemiological associations of the WID-relative-immune-age.                                                                                                            | 7  |
| 8  | Table S1. Epidemiological and clinical characteristics of the training set.                                                                                                      | 9  |
| 9  | Table S2. Epidemiological and clinical characteristics of the validation set 1.                                                                                                  | 10 |
| 10 | Table S3. WID-REA quantiles and breast cancer risk in pre-menopausal women in validation set 1.                                                                                  | 11 |
| 11 | Table S4. Ages of individuals in the breast tissue sets.                                                                                                                         | 12 |
| 12 | Table S5. Epidemiological and clinical characteristics of validation set 2.                                                                                                      | 13 |
| 13 | Table S6. List of samples used to assess the performance of age prediction.                                                                                                      | 14 |

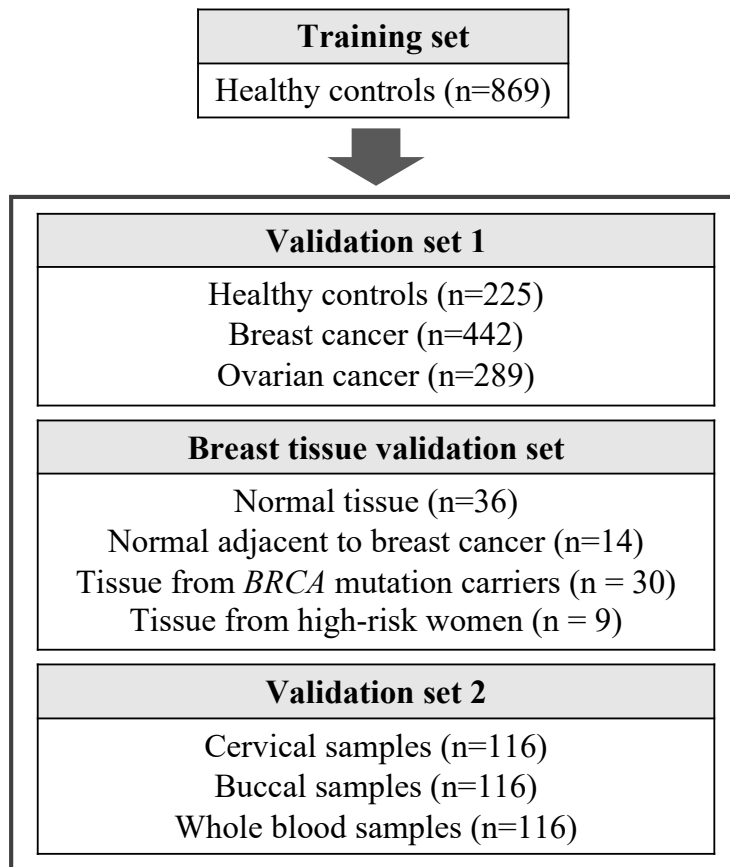

Fig. S1. Datasets and experimental design.

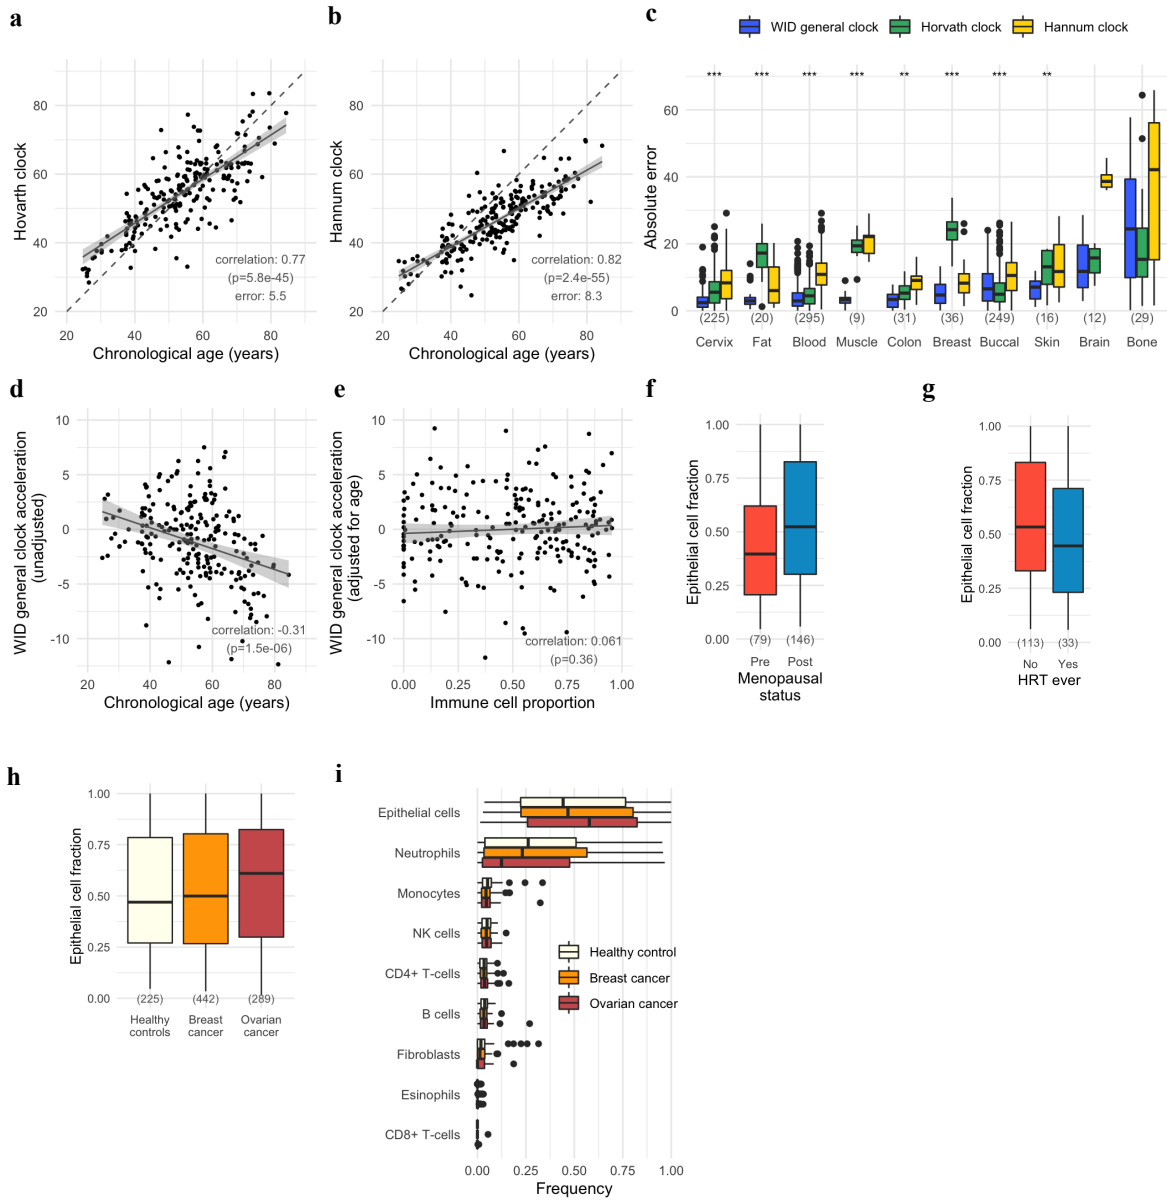

**Fig. S2. Detailed comparison of the WID general clock and other epigenetic clocks, and assessments of cell composition in response to menopause, hormone replacement and cancer.** Epigenetic age versus chronological age as predicted by **a** the Horvath or **b** Hannum clock. **c** Error (absolute difference between predicted and chronological age) in the WID general clock compared to existing clocks across different tissue types ( $p$  values correspond to a comparison of the WID general and Horvath clock). Age-acceleration (difference between the WID general clock and chronological age) versus **d** chronological age and **e** immune cell proportion. **f-h** show the epithelial proportion in cervical samples in response to **f** menopause, **g** HRT, or **h** in samples from different cancer patients compared to healthy controls. **i** Cell type composition in validation set 1.

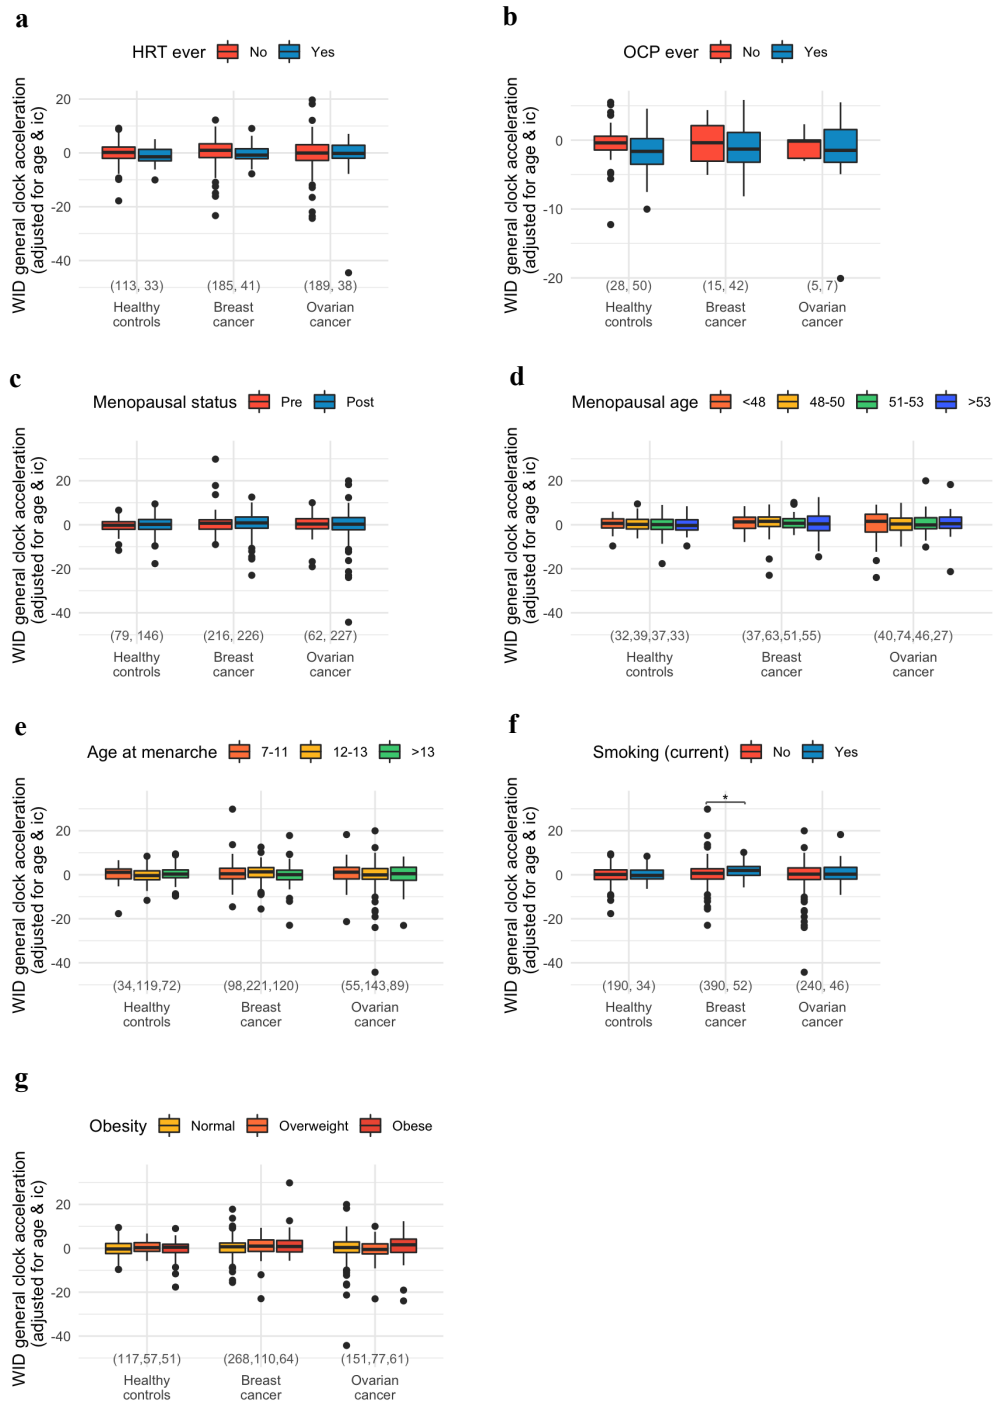

**Fig. S3. Detailed epidemiological assessment of the WID general clock age acceleration.** **a** The WID general clock age acceleration (adjusted for age and ic proportion) with respect to history of hormone replacement therapy (HRT) in post-menopausal women, **b** history of oral contraceptive pill (OCP) use in pre-menopausal women, **c** menopausal status, **d** age at menopause in post-menopausal women, **e** age at menarche, **f** current smoking, and **g** obesity (normal if body mass index (BMI) <25, overweight if BMI was between 25 and 30, and obese if BMI was >30) in cervical samples from validation set 1. \*,  $p \leq 0.05$ ; \*\*  $p \leq 0.01$  in Wilcoxon signed-rank test.

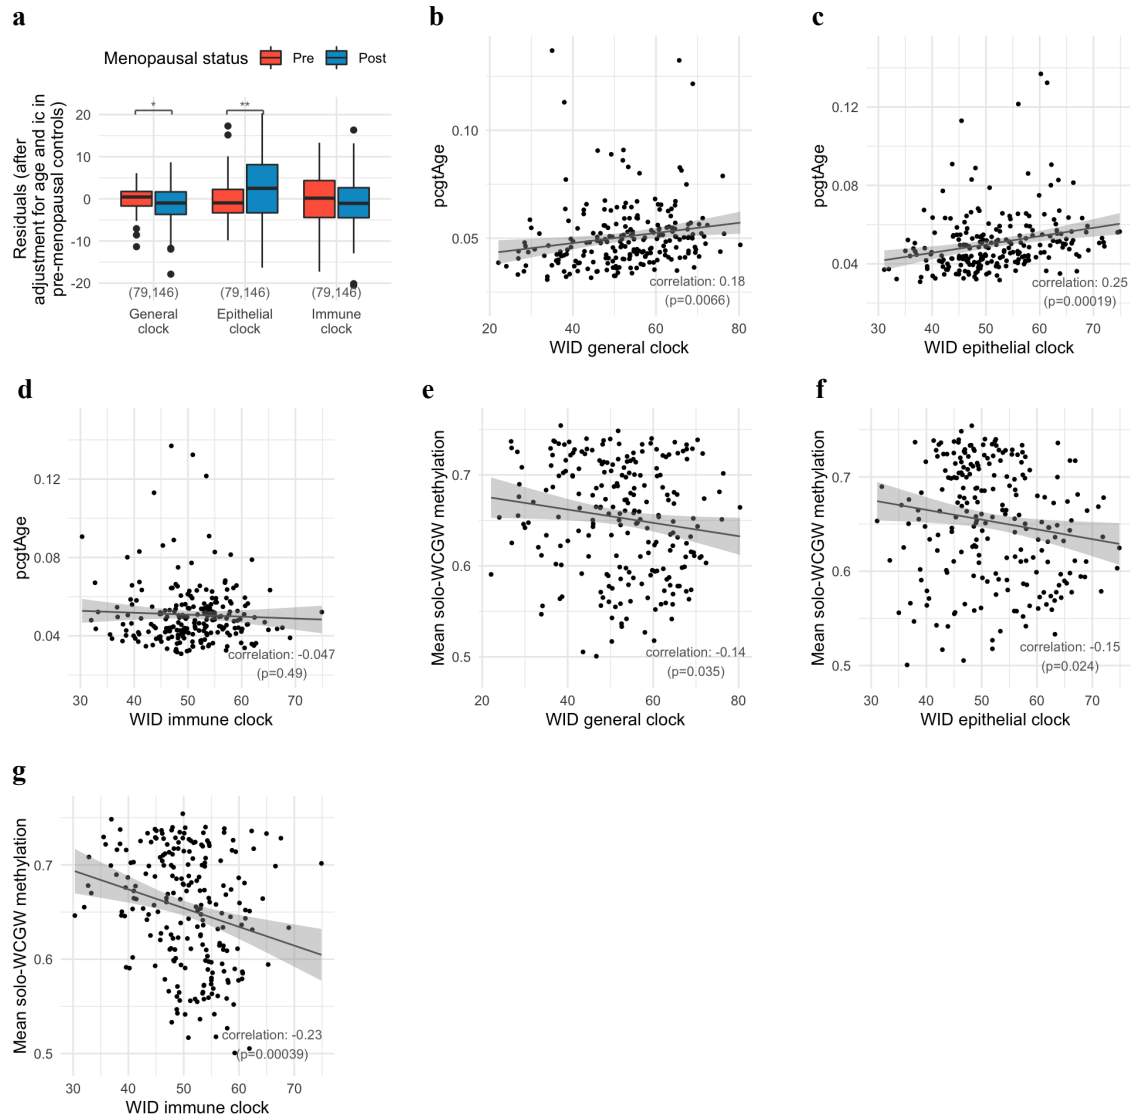

**Fig. S4. Association of the WID general, epithelial and immune clocks with menopause, replicative age, and solo-WCGW methylation.** **a** WID general, epithelial, and immune clocks with respect to menopausal status. **b** pcgtAge versus WID general clock, **c** WID epithelial clock, and **c** WID immune clock. **e** Mean solo-WCGW methylation (CpGs in locations of preferential hypomethylation in partially methylated domains) versus WID general clock, **f** WID epithelial clock, and **g** WID immune clock. Correlation and p values were obtained using Pearson product-moment correlation. \*,  $p \leq 0.05$ ; \*\*,  $p \leq 0.01$  in Wilcoxon signed-rank test.

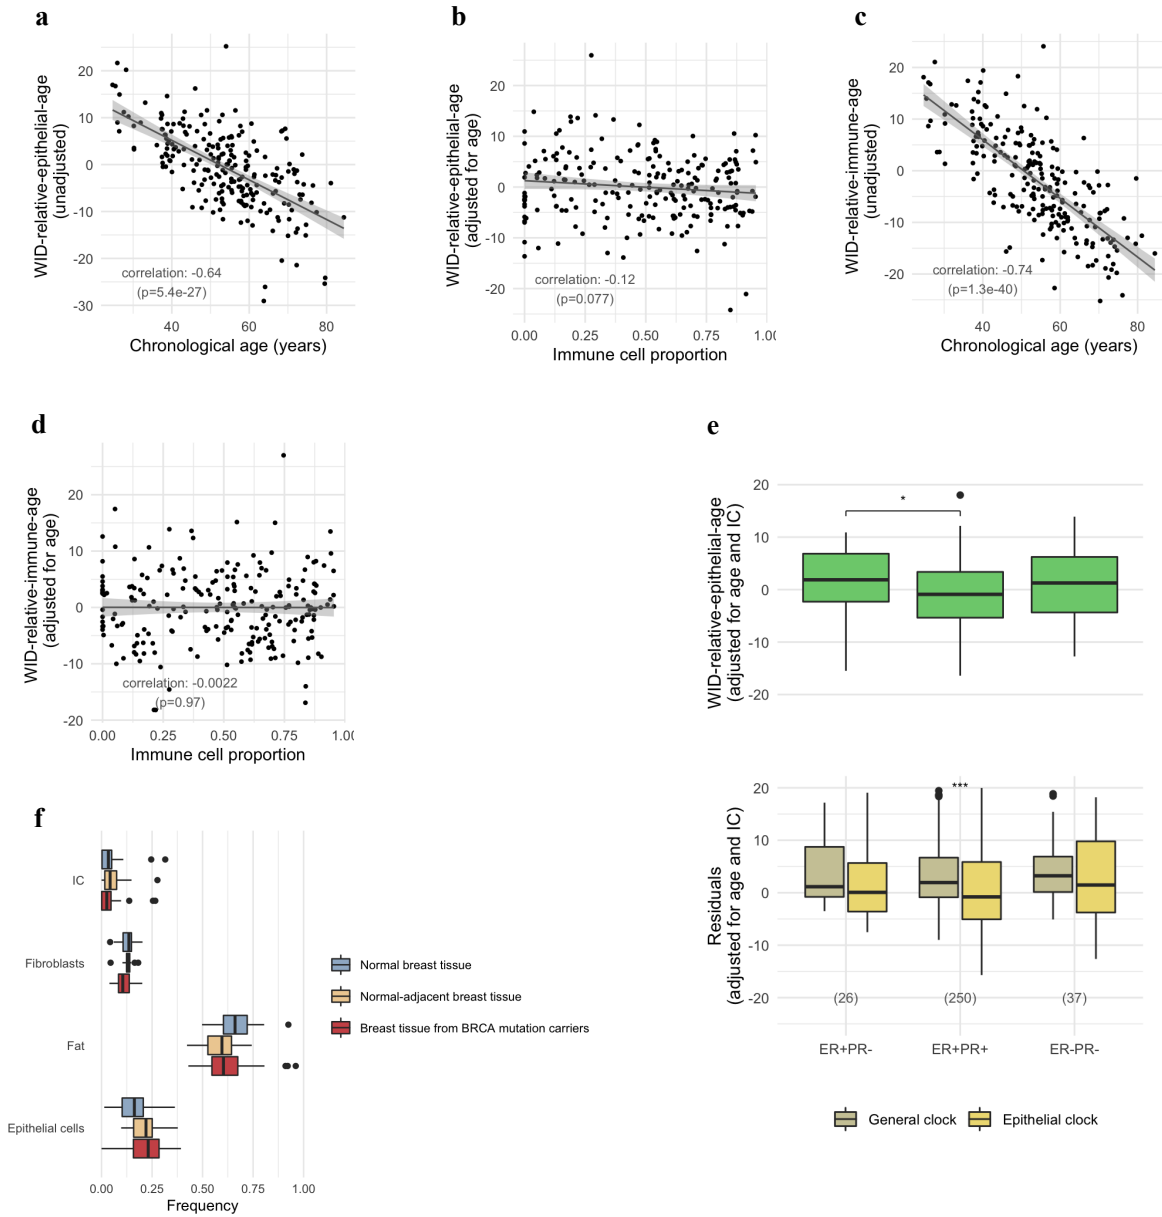

**Fig. S5. Association of WID-relative-epithelial- and -immune-age with chronological age and immune cell proportion and breast cancer subtype.** **a** WID-relative-epithelial-age versus chronological age and **b** ic proportion in cervical samples from controls from validation set 1. WID-relative-immune-age versus **c** chronological age and **d** ic proportion in cervical samples from controls from validation set 1. **e** WID-relative-epithelial-age, general, epithelial clocks in breast cancers. **f** Cell type composition of samples in the breast tissue set. \*,  $p \leq 0.05$ ; \*\*  $p \leq 0.01$  in (paired or unpaired) Wilcoxon signed-rank test, respectively. Correlations and p values in **a-d** were obtained using Pearson product-moment correlation.

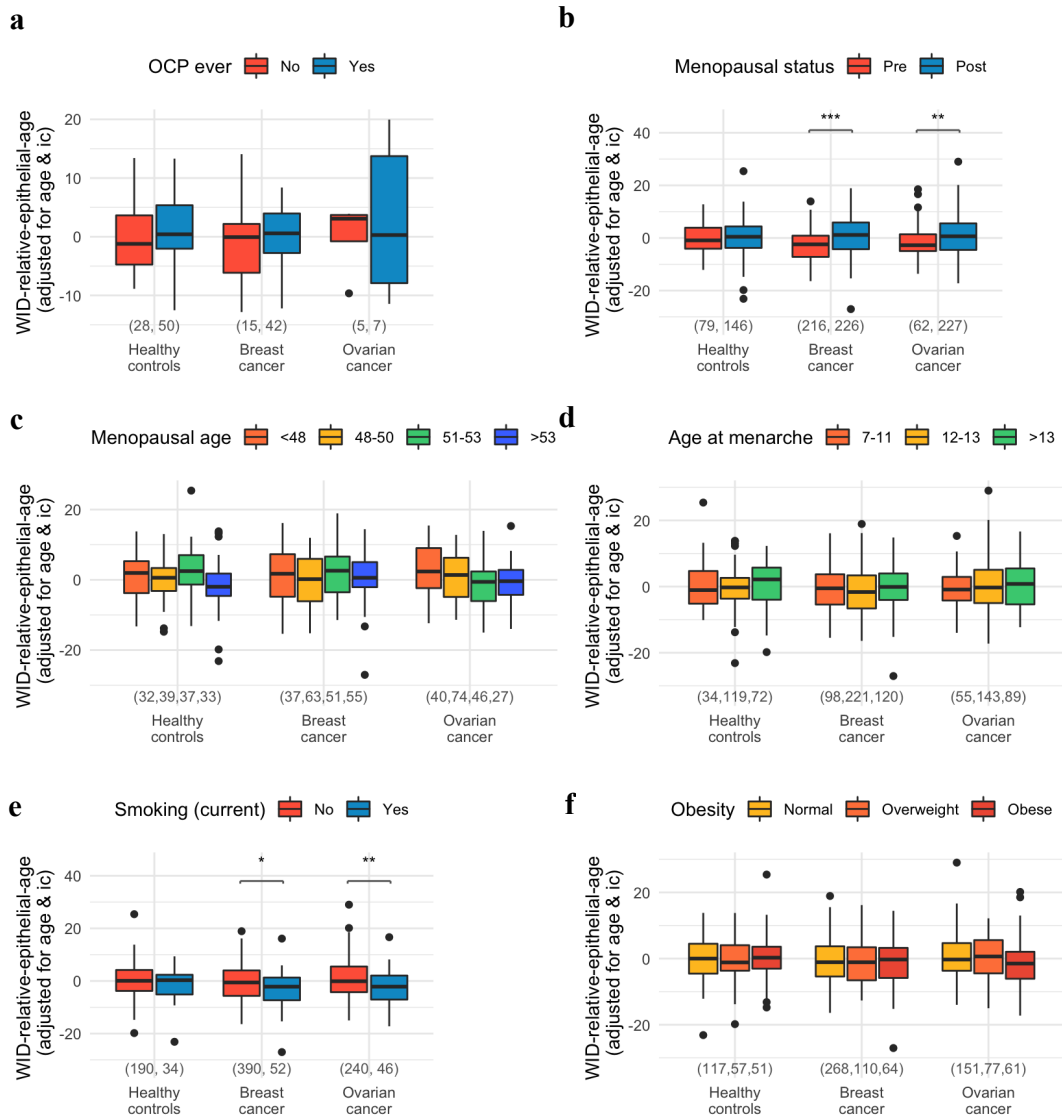

**Fig. S6. Epidemiological associations of the WID-relative-epithelial-age.** **a** WID-REA (adjusted for age and ic proportion) with respect to history of oral contraceptive pill (OCP) use in pre-menopausal women, **b** menopausal status, **c** age at menopause in post-menopausal women, **d** age at menarche, **e** current smoking and **f** obesity (normal if body mass index (BMI) <25, overweight if BMI was between 25 and 30, and obese if BMI was >30) in cervical samples from validation set 1. \*,  $p \leq 0.05$ ; \*\*  $p \leq 0.01$ ; \*\*\*  $p \leq 0.001$  in Wilcoxon signed-rank test.

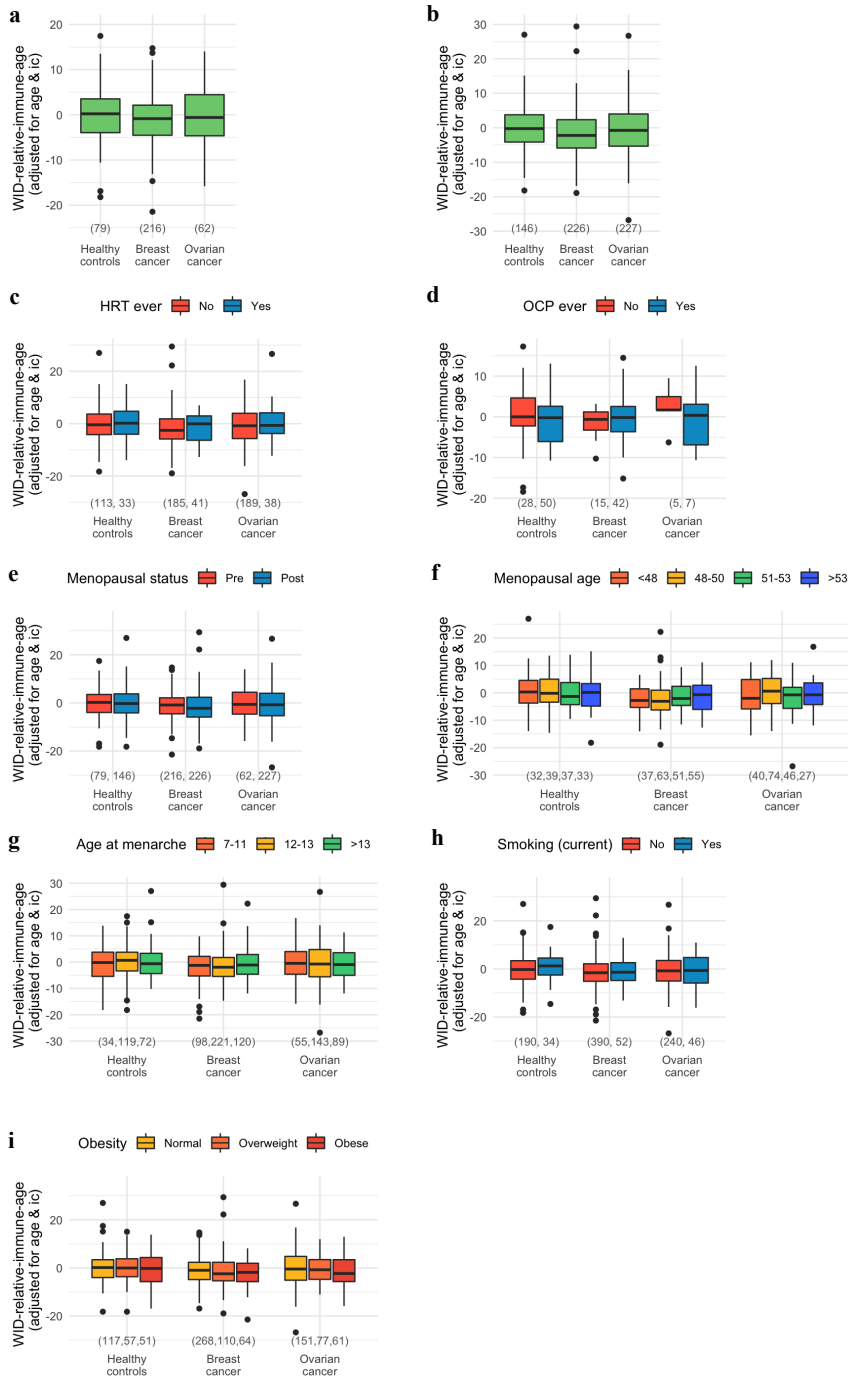

**Fig. S7. Epidemiological associations of the WID-relative-immune-age.** **a** WID-relative-immune-age (adjusted for age and ic proportion) with respect to pre-menopausal controls and cancers, **b** post-menopausal controls and cancers, **c** history of hormonal replacement therapy (HRT) in post-menopausal women, **d** history of oral contraceptive pill (OCP) use in pre-menopausal women, **e** menopausal status, **f** age at menopause in post-menopausal women, **g** age at menarche, **h** current smoking and **i** obesity (normal if body mass index (BMI) <25, overweight if BMI was between 25 and 30, and obese if BMI was >30) in samples from validation set 1. \*,  $p \leq 0.05$  in Wilcoxon signed-rank test.



Table S1. Epidemiological and clinical characteristics of the training set.

|                                                          | Healthy controls<br>n=869 |
|----------------------------------------------------------|---------------------------|
| <b>Age (years)</b>                                       |                           |
| <52                                                      | 538 (62%)                 |
| 52-64                                                    | 208 (24%)                 |
| >64                                                      | 123 (14%)                 |
| <b>Menopausal status</b>                                 |                           |
| Pre                                                      | 509 (59%)                 |
| Post                                                     | 360 (41%)                 |
| <b>Age at menopause (years)</b>                          |                           |
| <46                                                      | 423 (49%)                 |
| 46-52                                                    | 260 (30%)                 |
| >52                                                      | 101 (12%)                 |
| Missing or Unknown                                       | 85 (10%)                  |
| <b>Age at menarche (years)</b>                           |                           |
| <12                                                      | 150 (17%)                 |
| 12-13                                                    | 437 (50%)                 |
| >13                                                      | 277 (32%)                 |
| Missing or Unknown                                       | 5 (1%)                    |
| <b>Parous</b>                                            |                           |
| Yes                                                      | 636 (73%)                 |
| No                                                       | 232 (27%)                 |
| Missing or Unknown                                       | 1 (0%)                    |
| <b>Age at birth of first live child (years)</b>          |                           |
| <21                                                      | 22 (3%)                   |
| 21-27                                                    | 211 (34%)                 |
| >27                                                      | 396 (63%)                 |
| Missing or Unknown                                       | 240 (28%)                 |
| <b>Hormone replacement therapy (postmenopausal only)</b> |                           |
| No                                                       | 247 (69%)                 |
| Yes                                                      | 112 (31%)                 |
| Missing or Unknown                                       | 1 (0%)                    |
| <b>Current smoking</b>                                   |                           |
| No                                                       | 759 (87%)                 |
| Yes                                                      | 95 (11%)                  |
| Missing or Unknown                                       | 15 (2%)                   |
| <b>BMI (kg/m<sup>2</sup>)</b>                            |                           |
| <25                                                      | 445 (51%)                 |
| 25-30                                                    | 275 (32%)                 |
| >30                                                      | 149 (17%)                 |

Table S2. Epidemiological and clinical characteristics of the validation set 1.

|                                                          | Healthy controls<br>n=225 | Breast cancer<br>n=442 | Ovarian cancer<br>n=289 |
|----------------------------------------------------------|---------------------------|------------------------|-------------------------|
| <b>Age (years)</b>                                       |                           |                        |                         |
| <52                                                      | 91 (40%)                  | 223 (50%)              | 77 (27%)                |
| 52-64                                                    | 85 (38%)                  | 123 (28%)              | 103 (36%)               |
| >64                                                      | 49 (22%)                  | 96 (22%)               | 109 (38%)               |
| <b>Menopausal status</b>                                 |                           |                        |                         |
| Pre                                                      | 79 (35%)                  | 216 (49%)              | 62 (21%)                |
| Post                                                     | 146 (65%)                 | 226 (51%)              | 227 (79%)               |
| <b>Age at menopause (years)</b>                          |                           |                        |                         |
| <46                                                      | 82 (36%)                  | 141 (32%)              | 66 (23%)                |
| 46-52                                                    | 91 (40%)                  | 191 (43%)              | 138 (48%)               |
| >52                                                      | 47 (21%)                  | 88 (20%)               | 43 (15%)                |
| Missing or Unknown                                       | 5 (2%)                    | 22 (5%)                | 42 (15%)                |
| <b>Age at menarche (years)</b>                           |                           |                        |                         |
| <12                                                      | 34 (15%)                  | 98 (22%)               | 55 (19%)                |
| Dec-13                                                   | 119 (53%)                 | 221 (50%)              | 143 (49%)               |
| >13                                                      | 72 (32%)                  | 120 (27%)              | 89 (31%)                |
| Missing or Unknown                                       | 0 (0%)                    | 3 (1%)                 | 2 (1%)                  |
| <b>Parous</b>                                            |                           |                        |                         |
| Yes                                                      | 166 (74%)                 | 344 (78%)              | 222 (77%)               |
| No                                                       | 59 (26%)                  | 97 (22%)               | 65 (22%)                |
| Missing or Unknown                                       | 0 (0%)                    | 1 (0%)                 | 2 (1%)                  |
| <b>Age at birth of first live child (years)</b>          |                           |                        |                         |
| <21                                                      | 16 (7%)                   | 11 (2%)                | 15 (5%)                 |
| 21-27                                                    | 61 (27%)                  | 103 (23%)              | 127 (44%)               |
| >27                                                      | 84 (37%)                  | 226 (51%)              | 78 (27%)                |
| Missing or Unknown                                       | 64 (28%)                  | 102 (23%)              | 69 (24%)                |
| <b>Hormone replacement therapy (postmenopausal only)</b> |                           |                        |                         |
| No                                                       | 113 (77%)                 | 185 (82%)              | 189 (83%)               |
| Yes                                                      | 33 (23%)                  | 41 (18%)               | 38 (17%)                |
| Missing or Unknown                                       | 0 (0%)                    | 0 (0%)                 | 0 (0%)                  |
| <b>Oral contraceptive use (premenopausal only)</b>       |                           |                        |                         |
| No                                                       | 28 (35%)                  | 15 (7%)                | 5 (8%)                  |
| Yes                                                      | 50 (63%)                  | 42 (19%)               | 7 (11%)                 |
| Missing or Unknown                                       | 1 (1%)                    | 159 (74%)              | 50 (81%)                |
| <b>Current smoking</b>                                   |                           |                        |                         |
| No                                                       | 190 (84%)                 | 390 (88%)              | 240 (83%)               |
| Yes                                                      | 34 (15%)                  | 52 (12%)               | 46 (16%)                |
| Missing or Unknown                                       | 1 (0%)                    | 0 (0%)                 | 3 (1%)                  |
| <b>BMI (kg/m<sup>2</sup>)</b>                            |                           |                        |                         |
| <25                                                      | 117 (52%)                 | 268 (61%)              | 151 (52%)               |
| 25-30                                                    | 57 (25%)                  | 110 (25%)              | 77 (27%)                |
| >30                                                      | 51 (23%)                  | 64 (14%)               | 61 (21%)                |

**Table S3. WID-REA quantiles and breast cancer risk in pre-menopausal women in validation set 1.** WID-REA quantiles were defined based on control samples in validation set 1. Odds ratios for quantiles were computed using the highest quantile as the reference. Odds ratios and p values were determined using median-unbiased estimation.

| Quantile                 | Control   | Cancer    | Odds Ratio           | 95% CI           | p            |
|--------------------------|-----------|-----------|----------------------|------------------|--------------|
| <b>(3.03 to 16.79)</b>   | <b>20</b> | <b>32</b> | <b>1 (Reference)</b> | <b>-</b>         | <b>-</b>     |
| (-0.11 to 3.03)          | 20        | 49        | 1.52                 | 0.71-3.31        | 0.28         |
| (-3.31 to -0.11)         | 19        | 48        | 1.57                 | 0.72-3.44        | 0.25         |
| <b>(-16.91 to -3.31)</b> | <b>20</b> | <b>87</b> | <b>2.7</b>           | <b>1.28-5.72</b> | <b>0.009</b> |

**Table S4. Ages of individuals in the breast tissue sets.**

| <b>Set</b>                                          | <b>Age, mean (range)</b> |
|-----------------------------------------------------|--------------------------|
| Normal breast tissue                                | 28.97 (19-51)            |
| Normal-adjacent breast tissue                       | 43.14 (32-54)            |
| Breast tissue from <i>BRCA1/2</i> mutation carriers | 35.07 (22-51)            |

Table S5. Epidemiological and clinical characteristics of validation set 2.

|                                                          | Healthy controls<br>n=116 |
|----------------------------------------------------------|---------------------------|
| <b>Age (years)</b>                                       |                           |
| <52                                                      | 91 (78%)                  |
| 52-64                                                    | 15 (13%)                  |
| >64                                                      | 10 (9%)                   |
| <b>Menopausal status</b>                                 |                           |
| Pre                                                      | 91 (78%)                  |
| Post                                                     | 25 (22%)                  |
| <b>Age at menopause (years)</b>                          |                           |
| <46                                                      | 78 (67%)                  |
| 46-52                                                    | 28 (24%)                  |
| >52                                                      | 5 (4%)                    |
| Missing or Unknown                                       | 5 (4%)                    |
| <b>Age at menarche (years)</b>                           |                           |
| <12                                                      | 28 (24%)                  |
| 12-13                                                    | 55 (47%)                  |
| >13                                                      | 32 (28%)                  |
| Missing or Unknown                                       | 1 (1%)                    |
| <b>Parous</b>                                            |                           |
| Yes                                                      | 51 (44%)                  |
| No                                                       | 65 (56%)                  |
| <b>Hormone replacement therapy (postmenopausal only)</b> |                           |
| No                                                       | 13 (52%)                  |
| Yes                                                      | 12 (48%)                  |
| <b>Current smoking</b>                                   |                           |
| No                                                       | 105 (91%)                 |
| Yes                                                      | 11 (9%)                   |
| <b>BMI (kg/m<sup>2</sup>)</b>                            |                           |
| <25                                                      | 74 (64%)                  |
| 25-30                                                    | 28 (24%)                  |
| >30                                                      | 14 (12%)                  |

Table S6. List of samples used to assess the performance of age prediction.

| Number of samples |     |
|-------------------|-----|
| <b>Fat</b>        |     |
| GSE131461         | 20  |
| <b>Blood</b>      |     |
| GSE131461         | 20  |
| GSE145254         | 23  |
| GSE143307         | 48  |
| GSE130748         | 19  |
| GSE123914         | 69  |
| <b>Muscle</b>     |     |
| GSE114763         | 9   |
| <b>Colon</b>      |     |
| GSE142257         | 31  |
| <b>Buccal</b>     |     |
| GSE157252         | 134 |
| <b>Skin</b>       |     |
| GSE151617         | 16  |
| <b>Brain</b>      |     |
| GSE138597         | 12  |
| <b>Bone</b>       |     |
| GSE138307         | 29  |
